# Supplementary material for: Oxidative Stress and Antioxidant Defense in the Heart, Liver, and Kidney of Bat Species with Different Feeding Habits
Source: MDPI journal article supplement (doi:10.3390/ijms242216369), 2023-11-15
Supplement: s1 [file s1]

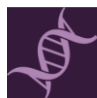

## S1. Biochemical Analysis

### S1.1. Oxidative damage

To assess protein damage, levels of carbonyl groups were determined using 2,4-dinitrophenyl hydrazine (DNPH) and measured at a wavelength of 370 nm [1]. The quantification of carbonyl levels was expressed as nmol of carbonyl per milligram of protein.

For the measurement of lipid peroxidation as an indicator, malondialdehyde (MDA) levels were determined by high-performance liquid chromatography (HPLC) using a reversed-phase column (SUPELCOSIL™ LC-18-DB HPLC column; 15 cm × 4.6 mm, 5 µm). The mobile phase consisted of a mixture of 30 mmol/L monobasic potassium phosphate (pH 3.6) and methanol (9:1, v/v) with a flow rate of 1 mL/min. Samples were injected in a volume of 25 µL, and the absorbance of the column effluent was monitored at 254 nm. The retention time of MDA under these conditions was 5.6 min [2]. MDA levels were expressed as nmol of MDA per milligram of protein.

### S1.2. Enzymatic activity

The SOD activity was determined using the RanSOD kit from Randox, County Antrim, UK. Measurement of fumarase activity involved the conversion of fumarate to malate, with detection performed at 240 nm [3]. The enzymatic kinetics of glutathione peroxidase (GPx) were evaluated using the Ransel Kit from Randox, County Antrim, UK. The GST antioxidant assay measured the formation of S-(2,4-dinitrophenyl)-glutathione through the enzymatic activity of GST via the conjugation of 1-chloro-2,4-dinitrobenzene (CDNB) and glutathione (GSH). The measurement of GST activity was carried out by determining the absorbance at a wavelength of 340 nm [4]. All enzyme activities were quantified as U/mg of protein.

The consumption of H<sub>2</sub>O<sub>2</sub> was evaluated with a protocol adapted for microplates [1]. 30% H<sub>2</sub>O<sub>2</sub> was diluted in 10 mL of sodium phosphate buffer (50 mmol/L, pH 7), and added into the sample to trigger the reaction measuring the rate of H<sub>2</sub>O<sub>2</sub> consumption via absorbance at 240 nm. H<sub>2</sub>O<sub>2</sub> consumption was reported because there are multiple H<sub>2</sub>O<sub>2</sub> detoxification mechanisms (mainly CAT and peroxiredoxins), and the test is not specific for any of them [5]. The activity was expressed as µmol of H<sub>2</sub>O<sub>2</sub> consumption/min/mg of protein.

All assays were independently performed in triplicate.

### S1.3. Non-enzymatic antioxidants

To indirectly measure the levels of nitric oxide, a modified version of the Griess test was employed to determine the total amounts of nitrate and nitrite (NO<sub>2</sub> and NO<sub>3</sub>) [6]. Indirect nitric oxide levels were expressed as nmol of NO<sub>2</sub> and NO<sub>3</sub> /mg protein.

GSH levels were evaluated, preparing a mixture with a solution: 5,5-dithiobis (2-nitrobenzoic acid, DTNB), glutathione reductase (GR, 250 U/mL), and NADPH to convert GSSG into GSH and trigger GSH. GSSG levels were measured and treated with 2-vinylpyridine which reacts covalently with GSH and was measured at 412 nm [7]. Results are presented as GSSG/GSH ratio.

### S1.4. Statistical Analysis

We conducted statistical analyses using the software PAST (version 4.12) to explore the relationships between antioxidant enzyme levels, oxidative stress marker levels and feeding guild in four bat species. Specifically, we performed a One-way PERMANOVA, Principal Component Analysis (PCA), and correlation analysis, as follows.

To test significant differences in the mean levels of each antioxidant and oxidative stress marker among the four bat species, we conducted One-way PERMANOVA. We first checked for normality using the Shapiro-Wilk test and verified the homogeneity of

variances using Levene's test. Since these assumptions were not met ( $< 0.05$ ), we performed the non-parametric test One-way PERMANOVA followed by a Bonferroni-corrected PERMANOVA pairwise comparison to compare pairwise differences between the bat species.

To explore patterns of variation among the variables, we conducted PCA. Before PCA, we performed a transformation method to eliminate the effects of differences in scale, which involved subtracting the mean of each variable from its values. We then conducted PCA on the covariance matrix of the normalized variables.

We also conducted correlation analysis to explore the relationships between the different antioxidant enzymes and oxidative stress marker levels. We calculated Spearman correlation coefficients for pairs of variables and tested their significance using two-tailed tests.

All statistical tests were conducted at the significance level of  $p < 0.05$ , and all reported  $p$ -values were two-tailed. We used Bonferroni correction to adjust for multiple comparisons when applicable.

## References

1. Levine, R.L.; Garland, D.; Oliver, C.N.; Amici, A.; Climent, I.; Lenz, A.-G.; Ahn, B.-W.; Shaltiel, S.; Stadtman, E.R. Determination of Carbonyl Content in Oxidatively Modified Proteins. In *Oxygen Radicals and Biological Systems Part B*; Academic Press: New York, **1990**; pp. 464–478.
2. Karatepe, M. Simultaneous Determination of Ascorbic Acid and Free Malondialdehyde in Human Serum by HPLC-UV. *LC-GC North Am.* **2004**, *22*, 362–365.
3. Mescam, M.; Vinnakota, K.C.; Beard, D.A. Identification of the Catalytic Mechanism and Estimation of Kinetic Parameters for Fumarase. *J. Biol. Chem.* **2011**, *286*, 21100–21109. <https://doi.org/10.1074/jbc.M111.232033>
4. Taniguchi, N.; Gutteridge, J. *Experimental Protocols for Reactive Oxygen and Nitrogen Species*, 1st ed.; Oxford University Press: New York, **2000**.
5. Li, Y.; Schellhorn, H.E. Rapid Kinetic Microassay for Catalase Activity. *J. Biomol. Tech.* **2007**, *18*, 185–187.
6. Grisham, M.B.; Johnson, G.G.; Lancaster, J.R. Quantitation of Nitrate and Nitrite in Extracellular Fluids. In *Nitric Oxide Part A Sources Detect. NO; NO Synthase*; Academic Press: New York, **1996**; pp. 237–246.
7. Rahman, I.; Kode, A.; Biswas, S.K. Assay for Quantitative Determination of Glutathione and Glutathione Disulfide Levels Using Enzymatic Recycling Method. *Nat. Protoc.* **2006**, *1*, 3159–3165. <https://doi.org/10.1038/nprot.2006.378>

**Table S1.** Pairwise PERMANOVA test among the samples of oxidative damage markers measured in the heart, liver, and kidney of nectarivorous, frugivorous, insectivorous, and hematophagous bats. Bolded numbers indicate statistically significant p-values ( $p < 0.05$ ).

[illegible]

**Table S2.** Pairwise PERMANOVA test among the samples of antioxidant enzymes measured in the heart, liver, and kidney of nectarivorous, frugivorous, insectivorous, and hematophagous bats. Bolded numbers indicate statistically significant p-values ( $p < 0.05$ ).

|                          | Heart                                                                                                                                                                                                                                                                                                                                                                                                                                       | Liver         | Kidney        |               |               |               |               |        |        |          |        |             |        |        |          |  |               |  |   |          |  |               |  |  |  |  |                                                                                                                                                                                                                                                                                                                                                                                                                                       |  |               |             |               |               |               |  |        |        |        |             |  |  |        |        |               |  |  |  |        |               |  |  |  |  |                                                                                                                                                                                                                                                                                                                                                                                                                                       |  |               |             |               |               |               |  |        |        |        |             |  |  |        |        |               |  |  |  |        |               |  |  |  |  |
|--------------------------|---------------------------------------------------------------------------------------------------------------------------------------------------------------------------------------------------------------------------------------------------------------------------------------------------------------------------------------------------------------------------------------------------------------------------------------------|---------------|---------------|---------------|---------------|---------------|---------------|--------|--------|----------|--------|-------------|--------|--------|----------|--|---------------|--|---|----------|--|---------------|--|--|--|--|---------------------------------------------------------------------------------------------------------------------------------------------------------------------------------------------------------------------------------------------------------------------------------------------------------------------------------------------------------------------------------------------------------------------------------------|--|---------------|-------------|---------------|---------------|---------------|--|--------|--------|--------|-------------|--|--|--------|--------|---------------|--|--|--|--------|---------------|--|--|--|--|---------------------------------------------------------------------------------------------------------------------------------------------------------------------------------------------------------------------------------------------------------------------------------------------------------------------------------------------------------------------------------------------------------------------------------------|--|---------------|-------------|---------------|---------------|---------------|--|--------|--------|--------|-------------|--|--|--------|--------|---------------|--|--|--|--------|---------------|--|--|--|--|
| H2O2 Consumption         | <table><tr><th></th><th>Nectarivorous</th><th>Frugivorous</th><th>Insectivorous</th><th>Hematophagous</th></tr><tr><td>Nectarivorous</td><td>0.2727</td><td>0.3301</td><td>0.0038</td><td></td></tr><tr><td>Frugivorous</td><td></td><td>1</td><td>0.0026</td><td></td></tr><tr><td>Insectivorous</td><td></td><td></td><td>0.0037</td><td></td></tr><tr><td>Hematophagous</td><td></td><td></td><td></td><td></td></tr></table>            |               | Nectarivorous | Frugivorous   | Insectivorous | Hematophagous | Nectarivorous | 0.2727 | 0.3301 | 0.0038   |        | Frugivorous |        | 1      | 0.0026   |  | Insectivorous |  |   | 0.0037   |  | Hematophagous |  |  |  |  | <table><tr><th></th><th>Nectarivorous</th><th>Frugivorous</th><th>Insectivorous</th><th>Hematophagous</th></tr><tr><td>Nectarivorous</td><td></td><td>0.2364</td><td>0.0199</td><td>0.8598</td></tr><tr><td>Frugivorous</td><td></td><td></td><td>0.0211</td><td>0.2364</td></tr><tr><td>Insectivorous</td><td></td><td></td><td></td><td>0.0551</td></tr><tr><td>Hematophagous</td><td></td><td></td><td></td><td></td></tr></table> |  | Nectarivorous | Frugivorous | Insectivorous | Hematophagous | Nectarivorous |  | 0.2364 | 0.0199 | 0.8598 | Frugivorous |  |  | 0.0211 | 0.2364 | Insectivorous |  |  |  | 0.0551 | Hematophagous |  |  |  |  | <table><tr><th></th><th>Nectarivorous</th><th>Frugivorous</th><th>Insectivorous</th><th>Hematophagous</th></tr><tr><td>Nectarivorous</td><td></td><td>1</td><td>0.0061</td><td>0.0087</td></tr><tr><td>Frugivorous</td><td></td><td></td><td>0.0024</td><td>1</td></tr><tr><td>Insectivorous</td><td></td><td></td><td></td><td>0.0038</td></tr><tr><td>Hematophagous</td><td></td><td></td><td></td><td></td></tr></table>           |  | Nectarivorous | Frugivorous | Insectivorous | Hematophagous | Nectarivorous |  | 1      | 0.0061 | 0.0087 | Frugivorous |  |  | 0.0024 | 1      | Insectivorous |  |  |  | 0.0038 | Hematophagous |  |  |  |  |
|                          |                                                                                                                                                                                                                                                                                                                                                                                                                                             | Nectarivorous | Frugivorous   | Insectivorous | Hematophagous |               |               |        |        |          |        |             |        |        |          |  |               |  |   |          |  |               |  |  |  |  |                                                                                                                                                                                                                                                                                                                                                                                                                                       |  |               |             |               |               |               |  |        |        |        |             |  |  |        |        |               |  |  |  |        |               |  |  |  |  |                                                                                                                                                                                                                                                                                                                                                                                                                                       |  |               |             |               |               |               |  |        |        |        |             |  |  |        |        |               |  |  |  |        |               |  |  |  |  |
|                          | Nectarivorous                                                                                                                                                                                                                                                                                                                                                                                                                               | 0.2727        | 0.3301        | 0.0038        |               |               |               |        |        |          |        |             |        |        |          |  |               |  |   |          |  |               |  |  |  |  |                                                                                                                                                                                                                                                                                                                                                                                                                                       |  |               |             |               |               |               |  |        |        |        |             |  |  |        |        |               |  |  |  |        |               |  |  |  |  |                                                                                                                                                                                                                                                                                                                                                                                                                                       |  |               |             |               |               |               |  |        |        |        |             |  |  |        |        |               |  |  |  |        |               |  |  |  |  |
|                          | Frugivorous                                                                                                                                                                                                                                                                                                                                                                                                                                 |               | 1             | 0.0026        |               |               |               |        |        |          |        |             |        |        |          |  |               |  |   |          |  |               |  |  |  |  |                                                                                                                                                                                                                                                                                                                                                                                                                                       |  |               |             |               |               |               |  |        |        |        |             |  |  |        |        |               |  |  |  |        |               |  |  |  |  |                                                                                                                                                                                                                                                                                                                                                                                                                                       |  |               |             |               |               |               |  |        |        |        |             |  |  |        |        |               |  |  |  |        |               |  |  |  |  |
|                          | Insectivorous                                                                                                                                                                                                                                                                                                                                                                                                                               |               |               | 0.0037        |               |               |               |        |        |          |        |             |        |        |          |  |               |  |   |          |  |               |  |  |  |  |                                                                                                                                                                                                                                                                                                                                                                                                                                       |  |               |             |               |               |               |  |        |        |        |             |  |  |        |        |               |  |  |  |        |               |  |  |  |  |                                                                                                                                                                                                                                                                                                                                                                                                                                       |  |               |             |               |               |               |  |        |        |        |             |  |  |        |        |               |  |  |  |        |               |  |  |  |  |
| Hematophagous            |                                                                                                                                                                                                                                                                                                                                                                                                                                             |               |               |               |               |               |               |        |        |          |        |             |        |        |          |  |               |  |   |          |  |               |  |  |  |  |                                                                                                                                                                                                                                                                                                                                                                                                                                       |  |               |             |               |               |               |  |        |        |        |             |  |  |        |        |               |  |  |  |        |               |  |  |  |  |                                                                                                                                                                                                                                                                                                                                                                                                                                       |  |               |             |               |               |               |  |        |        |        |             |  |  |        |        |               |  |  |  |        |               |  |  |  |  |
|                          | Nectarivorous                                                                                                                                                                                                                                                                                                                                                                                                                               | Frugivorous   | Insectivorous | Hematophagous |               |               |               |        |        |          |        |             |        |        |          |  |               |  |   |          |  |               |  |  |  |  |                                                                                                                                                                                                                                                                                                                                                                                                                                       |  |               |             |               |               |               |  |        |        |        |             |  |  |        |        |               |  |  |  |        |               |  |  |  |  |                                                                                                                                                                                                                                                                                                                                                                                                                                       |  |               |             |               |               |               |  |        |        |        |             |  |  |        |        |               |  |  |  |        |               |  |  |  |  |
| Nectarivorous            |                                                                                                                                                                                                                                                                                                                                                                                                                                             | 0.2364        | 0.0199        | 0.8598        |               |               |               |        |        |          |        |             |        |        |          |  |               |  |   |          |  |               |  |  |  |  |                                                                                                                                                                                                                                                                                                                                                                                                                                       |  |               |             |               |               |               |  |        |        |        |             |  |  |        |        |               |  |  |  |        |               |  |  |  |  |                                                                                                                                                                                                                                                                                                                                                                                                                                       |  |               |             |               |               |               |  |        |        |        |             |  |  |        |        |               |  |  |  |        |               |  |  |  |  |
| Frugivorous              |                                                                                                                                                                                                                                                                                                                                                                                                                                             |               | 0.0211        | 0.2364        |               |               |               |        |        |          |        |             |        |        |          |  |               |  |   |          |  |               |  |  |  |  |                                                                                                                                                                                                                                                                                                                                                                                                                                       |  |               |             |               |               |               |  |        |        |        |             |  |  |        |        |               |  |  |  |        |               |  |  |  |  |                                                                                                                                                                                                                                                                                                                                                                                                                                       |  |               |             |               |               |               |  |        |        |        |             |  |  |        |        |               |  |  |  |        |               |  |  |  |  |
| Insectivorous            |                                                                                                                                                                                                                                                                                                                                                                                                                                             |               |               | 0.0551        |               |               |               |        |        |          |        |             |        |        |          |  |               |  |   |          |  |               |  |  |  |  |                                                                                                                                                                                                                                                                                                                                                                                                                                       |  |               |             |               |               |               |  |        |        |        |             |  |  |        |        |               |  |  |  |        |               |  |  |  |  |                                                                                                                                                                                                                                                                                                                                                                                                                                       |  |               |             |               |               |               |  |        |        |        |             |  |  |        |        |               |  |  |  |        |               |  |  |  |  |
| Hematophagous            |                                                                                                                                                                                                                                                                                                                                                                                                                                             |               |               |               |               |               |               |        |        |          |        |             |        |        |          |  |               |  |   |          |  |               |  |  |  |  |                                                                                                                                                                                                                                                                                                                                                                                                                                       |  |               |             |               |               |               |  |        |        |        |             |  |  |        |        |               |  |  |  |        |               |  |  |  |  |                                                                                                                                                                                                                                                                                                                                                                                                                                       |  |               |             |               |               |               |  |        |        |        |             |  |  |        |        |               |  |  |  |        |               |  |  |  |  |
|                          | Nectarivorous                                                                                                                                                                                                                                                                                                                                                                                                                               | Frugivorous   | Insectivorous | Hematophagous |               |               |               |        |        |          |        |             |        |        |          |  |               |  |   |          |  |               |  |  |  |  |                                                                                                                                                                                                                                                                                                                                                                                                                                       |  |               |             |               |               |               |  |        |        |        |             |  |  |        |        |               |  |  |  |        |               |  |  |  |  |                                                                                                                                                                                                                                                                                                                                                                                                                                       |  |               |             |               |               |               |  |        |        |        |             |  |  |        |        |               |  |  |  |        |               |  |  |  |  |
| Nectarivorous            |                                                                                                                                                                                                                                                                                                                                                                                                                                             | 1             | 0.0061        | 0.0087        |               |               |               |        |        |          |        |             |        |        |          |  |               |  |   |          |  |               |  |  |  |  |                                                                                                                                                                                                                                                                                                                                                                                                                                       |  |               |             |               |               |               |  |        |        |        |             |  |  |        |        |               |  |  |  |        |               |  |  |  |  |                                                                                                                                                                                                                                                                                                                                                                                                                                       |  |               |             |               |               |               |  |        |        |        |             |  |  |        |        |               |  |  |  |        |               |  |  |  |  |
| Frugivorous              |                                                                                                                                                                                                                                                                                                                                                                                                                                             |               | 0.0024        | 1             |               |               |               |        |        |          |        |             |        |        |          |  |               |  |   |          |  |               |  |  |  |  |                                                                                                                                                                                                                                                                                                                                                                                                                                       |  |               |             |               |               |               |  |        |        |        |             |  |  |        |        |               |  |  |  |        |               |  |  |  |  |                                                                                                                                                                                                                                                                                                                                                                                                                                       |  |               |             |               |               |               |  |        |        |        |             |  |  |        |        |               |  |  |  |        |               |  |  |  |  |
| Insectivorous            |                                                                                                                                                                                                                                                                                                                                                                                                                                             |               |               | 0.0038        |               |               |               |        |        |          |        |             |        |        |          |  |               |  |   |          |  |               |  |  |  |  |                                                                                                                                                                                                                                                                                                                                                                                                                                       |  |               |             |               |               |               |  |        |        |        |             |  |  |        |        |               |  |  |  |        |               |  |  |  |  |                                                                                                                                                                                                                                                                                                                                                                                                                                       |  |               |             |               |               |               |  |        |        |        |             |  |  |        |        |               |  |  |  |        |               |  |  |  |  |
| Hematophagous            |                                                                                                                                                                                                                                                                                                                                                                                                                                             |               |               |               |               |               |               |        |        |          |        |             |        |        |          |  |               |  |   |          |  |               |  |  |  |  |                                                                                                                                                                                                                                                                                                                                                                                                                                       |  |               |             |               |               |               |  |        |        |        |             |  |  |        |        |               |  |  |  |        |               |  |  |  |  |                                                                                                                                                                                                                                                                                                                                                                                                                                       |  |               |             |               |               |               |  |        |        |        |             |  |  |        |        |               |  |  |  |        |               |  |  |  |  |
| Superoxide dismutase     | <table><tr><th></th><th>Nectarivorous</th><th>Frugivorous</th><th>Insectivorous</th><th>Hematophagous</th></tr><tr><td>Nectarivorous</td><td>0.2258</td><td>0.1035</td><td>0.0016</td><td></td></tr><tr><td>Frugivorous</td><td></td><td>1</td><td>0.0016</td><td></td></tr><tr><td>Insectivorous</td><td></td><td></td><td>0.0016</td><td></td></tr><tr><td>Hematophagous</td><td></td><td></td><td></td><td></td></tr></table>            |               | Nectarivorous | Frugivorous   | Insectivorous | Hematophagous | Nectarivorous | 0.2258 | 0.1035 | 0.0016   |        | Frugivorous |        | 1      | 0.0016   |  | Insectivorous |  |   | 0.0016   |  | Hematophagous |  |  |  |  | <table><tr><th></th><th>Nectarivorous</th><th>Frugivorous</th><th>Insectivorous</th><th>Hematophagous</th></tr><tr><td>Nectarivorous</td><td></td><td>0.3229</td><td>0.1035</td><td>0.0026</td></tr><tr><td>Frugivorous</td><td></td><td></td><td>1</td><td>0.0026</td></tr><tr><td>Insectivorous</td><td></td><td></td><td></td><td>0.0026</td></tr><tr><td>Hematophagous</td><td></td><td></td><td></td><td></td></tr></table>      |  | Nectarivorous | Frugivorous | Insectivorous | Hematophagous | Nectarivorous |  | 0.3229 | 0.1035 | 0.0026 | Frugivorous |  |  | 1      | 0.0026 | Insectivorous |  |  |  | 0.0026 | Hematophagous |  |  |  |  | <table><tr><th></th><th>Nectarivorous</th><th>Frugivorous</th><th>Insectivorous</th><th>Hematophagous</th></tr><tr><td>Nectarivorous</td><td></td><td>0.0374</td><td>0.0024</td><td>0.5604</td></tr><tr><td>Frugivorous</td><td></td><td></td><td>0.0042</td><td>0.0042</td></tr><tr><td>Insectivorous</td><td></td><td></td><td></td><td>0.0024</td></tr><tr><td>Hematophagous</td><td></td><td></td><td></td><td></td></tr></table> |  | Nectarivorous | Frugivorous | Insectivorous | Hematophagous | Nectarivorous |  | 0.0374 | 0.0024 | 0.5604 | Frugivorous |  |  | 0.0042 | 0.0042 | Insectivorous |  |  |  | 0.0024 | Hematophagous |  |  |  |  |
|                          |                                                                                                                                                                                                                                                                                                                                                                                                                                             | Nectarivorous | Frugivorous   | Insectivorous | Hematophagous |               |               |        |        |          |        |             |        |        |          |  |               |  |   |          |  |               |  |  |  |  |                                                                                                                                                                                                                                                                                                                                                                                                                                       |  |               |             |               |               |               |  |        |        |        |             |  |  |        |        |               |  |  |  |        |               |  |  |  |  |                                                                                                                                                                                                                                                                                                                                                                                                                                       |  |               |             |               |               |               |  |        |        |        |             |  |  |        |        |               |  |  |  |        |               |  |  |  |  |
|                          | Nectarivorous                                                                                                                                                                                                                                                                                                                                                                                                                               | 0.2258        | 0.1035        | 0.0016        |               |               |               |        |        |          |        |             |        |        |          |  |               |  |   |          |  |               |  |  |  |  |                                                                                                                                                                                                                                                                                                                                                                                                                                       |  |               |             |               |               |               |  |        |        |        |             |  |  |        |        |               |  |  |  |        |               |  |  |  |  |                                                                                                                                                                                                                                                                                                                                                                                                                                       |  |               |             |               |               |               |  |        |        |        |             |  |  |        |        |               |  |  |  |        |               |  |  |  |  |
|                          | Frugivorous                                                                                                                                                                                                                                                                                                                                                                                                                                 |               | 1             | 0.0016        |               |               |               |        |        |          |        |             |        |        |          |  |               |  |   |          |  |               |  |  |  |  |                                                                                                                                                                                                                                                                                                                                                                                                                                       |  |               |             |               |               |               |  |        |        |        |             |  |  |        |        |               |  |  |  |        |               |  |  |  |  |                                                                                                                                                                                                                                                                                                                                                                                                                                       |  |               |             |               |               |               |  |        |        |        |             |  |  |        |        |               |  |  |  |        |               |  |  |  |  |
|                          | Insectivorous                                                                                                                                                                                                                                                                                                                                                                                                                               |               |               | 0.0016        |               |               |               |        |        |          |        |             |        |        |          |  |               |  |   |          |  |               |  |  |  |  |                                                                                                                                                                                                                                                                                                                                                                                                                                       |  |               |             |               |               |               |  |        |        |        |             |  |  |        |        |               |  |  |  |        |               |  |  |  |  |                                                                                                                                                                                                                                                                                                                                                                                                                                       |  |               |             |               |               |               |  |        |        |        |             |  |  |        |        |               |  |  |  |        |               |  |  |  |  |
| Hematophagous            |                                                                                                                                                                                                                                                                                                                                                                                                                                             |               |               |               |               |               |               |        |        |          |        |             |        |        |          |  |               |  |   |          |  |               |  |  |  |  |                                                                                                                                                                                                                                                                                                                                                                                                                                       |  |               |             |               |               |               |  |        |        |        |             |  |  |        |        |               |  |  |  |        |               |  |  |  |  |                                                                                                                                                                                                                                                                                                                                                                                                                                       |  |               |             |               |               |               |  |        |        |        |             |  |  |        |        |               |  |  |  |        |               |  |  |  |  |
|                          | Nectarivorous                                                                                                                                                                                                                                                                                                                                                                                                                               | Frugivorous   | Insectivorous | Hematophagous |               |               |               |        |        |          |        |             |        |        |          |  |               |  |   |          |  |               |  |  |  |  |                                                                                                                                                                                                                                                                                                                                                                                                                                       |  |               |             |               |               |               |  |        |        |        |             |  |  |        |        |               |  |  |  |        |               |  |  |  |  |                                                                                                                                                                                                                                                                                                                                                                                                                                       |  |               |             |               |               |               |  |        |        |        |             |  |  |        |        |               |  |  |  |        |               |  |  |  |  |
| Nectarivorous            |                                                                                                                                                                                                                                                                                                                                                                                                                                             | 0.3229        | 0.1035        | 0.0026        |               |               |               |        |        |          |        |             |        |        |          |  |               |  |   |          |  |               |  |  |  |  |                                                                                                                                                                                                                                                                                                                                                                                                                                       |  |               |             |               |               |               |  |        |        |        |             |  |  |        |        |               |  |  |  |        |               |  |  |  |  |                                                                                                                                                                                                                                                                                                                                                                                                                                       |  |               |             |               |               |               |  |        |        |        |             |  |  |        |        |               |  |  |  |        |               |  |  |  |  |
| Frugivorous              |                                                                                                                                                                                                                                                                                                                                                                                                                                             |               | 1             | 0.0026        |               |               |               |        |        |          |        |             |        |        |          |  |               |  |   |          |  |               |  |  |  |  |                                                                                                                                                                                                                                                                                                                                                                                                                                       |  |               |             |               |               |               |  |        |        |        |             |  |  |        |        |               |  |  |  |        |               |  |  |  |  |                                                                                                                                                                                                                                                                                                                                                                                                                                       |  |               |             |               |               |               |  |        |        |        |             |  |  |        |        |               |  |  |  |        |               |  |  |  |  |
| Insectivorous            |                                                                                                                                                                                                                                                                                                                                                                                                                                             |               |               | 0.0026        |               |               |               |        |        |          |        |             |        |        |          |  |               |  |   |          |  |               |  |  |  |  |                                                                                                                                                                                                                                                                                                                                                                                                                                       |  |               |             |               |               |               |  |        |        |        |             |  |  |        |        |               |  |  |  |        |               |  |  |  |  |                                                                                                                                                                                                                                                                                                                                                                                                                                       |  |               |             |               |               |               |  |        |        |        |             |  |  |        |        |               |  |  |  |        |               |  |  |  |  |
| Hematophagous            |                                                                                                                                                                                                                                                                                                                                                                                                                                             |               |               |               |               |               |               |        |        |          |        |             |        |        |          |  |               |  |   |          |  |               |  |  |  |  |                                                                                                                                                                                                                                                                                                                                                                                                                                       |  |               |             |               |               |               |  |        |        |        |             |  |  |        |        |               |  |  |  |        |               |  |  |  |  |                                                                                                                                                                                                                                                                                                                                                                                                                                       |  |               |             |               |               |               |  |        |        |        |             |  |  |        |        |               |  |  |  |        |               |  |  |  |  |
|                          | Nectarivorous                                                                                                                                                                                                                                                                                                                                                                                                                               | Frugivorous   | Insectivorous | Hematophagous |               |               |               |        |        |          |        |             |        |        |          |  |               |  |   |          |  |               |  |  |  |  |                                                                                                                                                                                                                                                                                                                                                                                                                                       |  |               |             |               |               |               |  |        |        |        |             |  |  |        |        |               |  |  |  |        |               |  |  |  |  |                                                                                                                                                                                                                                                                                                                                                                                                                                       |  |               |             |               |               |               |  |        |        |        |             |  |  |        |        |               |  |  |  |        |               |  |  |  |  |
| Nectarivorous            |                                                                                                                                                                                                                                                                                                                                                                                                                                             | 0.0374        | 0.0024        | 0.5604        |               |               |               |        |        |          |        |             |        |        |          |  |               |  |   |          |  |               |  |  |  |  |                                                                                                                                                                                                                                                                                                                                                                                                                                       |  |               |             |               |               |               |  |        |        |        |             |  |  |        |        |               |  |  |  |        |               |  |  |  |  |                                                                                                                                                                                                                                                                                                                                                                                                                                       |  |               |             |               |               |               |  |        |        |        |             |  |  |        |        |               |  |  |  |        |               |  |  |  |  |
| Frugivorous              |                                                                                                                                                                                                                                                                                                                                                                                                                                             |               | 0.0042        | 0.0042        |               |               |               |        |        |          |        |             |        |        |          |  |               |  |   |          |  |               |  |  |  |  |                                                                                                                                                                                                                                                                                                                                                                                                                                       |  |               |             |               |               |               |  |        |        |        |             |  |  |        |        |               |  |  |  |        |               |  |  |  |  |                                                                                                                                                                                                                                                                                                                                                                                                                                       |  |               |             |               |               |               |  |        |        |        |             |  |  |        |        |               |  |  |  |        |               |  |  |  |  |
| Insectivorous            |                                                                                                                                                                                                                                                                                                                                                                                                                                             |               |               | 0.0024        |               |               |               |        |        |          |        |             |        |        |          |  |               |  |   |          |  |               |  |  |  |  |                                                                                                                                                                                                                                                                                                                                                                                                                                       |  |               |             |               |               |               |  |        |        |        |             |  |  |        |        |               |  |  |  |        |               |  |  |  |  |                                                                                                                                                                                                                                                                                                                                                                                                                                       |  |               |             |               |               |               |  |        |        |        |             |  |  |        |        |               |  |  |  |        |               |  |  |  |  |
| Hematophagous            |                                                                                                                                                                                                                                                                                                                                                                                                                                             |               |               |               |               |               |               |        |        |          |        |             |        |        |          |  |               |  |   |          |  |               |  |  |  |  |                                                                                                                                                                                                                                                                                                                                                                                                                                       |  |               |             |               |               |               |  |        |        |        |             |  |  |        |        |               |  |  |  |        |               |  |  |  |  |                                                                                                                                                                                                                                                                                                                                                                                                                                       |  |               |             |               |               |               |  |        |        |        |             |  |  |        |        |               |  |  |  |        |               |  |  |  |  |
| Fumarase                 | <table><tr><th></th><th>Nectarivorous</th><th>Frugivorous</th><th>Insectivorous</th><th>Hematophagous</th></tr><tr><td>Nectarivorous</td><td></td><td></td><td></td><td>0.0013</td></tr><tr><td>Frugivorous</td><td>0.0052</td><td>0.0374</td><td>0.0056</td><td></td></tr><tr><td>Insectivorous</td><td></td><td>1</td><td>0.0038</td><td></td></tr><tr><td>Hematophagous</td><td></td><td></td><td></td><td></td></tr></table>            |               | Nectarivorous | Frugivorous   | Insectivorous | Hematophagous | Nectarivorous |        |        |          | 0.0013 | Frugivorous | 0.0052 | 0.0374 | 0.0056   |  | Insectivorous |  | 1 | 0.0038   |  | Hematophagous |  |  |  |  | <table><tr><th></th><th>Nectarivorous</th><th>Frugivorous</th><th>Insectivorous</th><th>Hematophagous</th></tr><tr><td>Nectarivorous</td><td></td><td>0.0038</td><td>0.0024</td><td>0.0038</td></tr><tr><td>Frugivorous</td><td></td><td></td><td>0.0054</td><td>0.0116</td></tr><tr><td>Insectivorous</td><td></td><td></td><td></td><td>0.815</td></tr><tr><td>Hematophagous</td><td></td><td></td><td></td><td></td></tr></table>  |  | Nectarivorous | Frugivorous | Insectivorous | Hematophagous | Nectarivorous |  | 0.0038 | 0.0024 | 0.0038 | Frugivorous |  |  | 0.0054 | 0.0116 | Insectivorous |  |  |  | 0.815  | Hematophagous |  |  |  |  | <table><tr><th></th><th>Nectarivorous</th><th>Frugivorous</th><th>Insectivorous</th><th>Hematophagous</th></tr><tr><td>Nectarivorous</td><td></td><td>0.6718</td><td>0.0024</td><td>0.0016</td></tr><tr><td>Frugivorous</td><td></td><td></td><td>0.0024</td><td>0.0016</td></tr><tr><td>Insectivorous</td><td></td><td></td><td></td><td>0.0224</td></tr><tr><td>Hematophagous</td><td></td><td></td><td></td><td></td></tr></table> |  | Nectarivorous | Frugivorous | Insectivorous | Hematophagous | Nectarivorous |  | 0.6718 | 0.0024 | 0.0016 | Frugivorous |  |  | 0.0024 | 0.0016 | Insectivorous |  |  |  | 0.0224 | Hematophagous |  |  |  |  |
|                          |                                                                                                                                                                                                                                                                                                                                                                                                                                             | Nectarivorous | Frugivorous   | Insectivorous | Hematophagous |               |               |        |        |          |        |             |        |        |          |  |               |  |   |          |  |               |  |  |  |  |                                                                                                                                                                                                                                                                                                                                                                                                                                       |  |               |             |               |               |               |  |        |        |        |             |  |  |        |        |               |  |  |  |        |               |  |  |  |  |                                                                                                                                                                                                                                                                                                                                                                                                                                       |  |               |             |               |               |               |  |        |        |        |             |  |  |        |        |               |  |  |  |        |               |  |  |  |  |
|                          | Nectarivorous                                                                                                                                                                                                                                                                                                                                                                                                                               |               |               |               | 0.0013        |               |               |        |        |          |        |             |        |        |          |  |               |  |   |          |  |               |  |  |  |  |                                                                                                                                                                                                                                                                                                                                                                                                                                       |  |               |             |               |               |               |  |        |        |        |             |  |  |        |        |               |  |  |  |        |               |  |  |  |  |                                                                                                                                                                                                                                                                                                                                                                                                                                       |  |               |             |               |               |               |  |        |        |        |             |  |  |        |        |               |  |  |  |        |               |  |  |  |  |
|                          | Frugivorous                                                                                                                                                                                                                                                                                                                                                                                                                                 | 0.0052        | 0.0374        | 0.0056        |               |               |               |        |        |          |        |             |        |        |          |  |               |  |   |          |  |               |  |  |  |  |                                                                                                                                                                                                                                                                                                                                                                                                                                       |  |               |             |               |               |               |  |        |        |        |             |  |  |        |        |               |  |  |  |        |               |  |  |  |  |                                                                                                                                                                                                                                                                                                                                                                                                                                       |  |               |             |               |               |               |  |        |        |        |             |  |  |        |        |               |  |  |  |        |               |  |  |  |  |
|                          | Insectivorous                                                                                                                                                                                                                                                                                                                                                                                                                               |               | 1             | 0.0038        |               |               |               |        |        |          |        |             |        |        |          |  |               |  |   |          |  |               |  |  |  |  |                                                                                                                                                                                                                                                                                                                                                                                                                                       |  |               |             |               |               |               |  |        |        |        |             |  |  |        |        |               |  |  |  |        |               |  |  |  |  |                                                                                                                                                                                                                                                                                                                                                                                                                                       |  |               |             |               |               |               |  |        |        |        |             |  |  |        |        |               |  |  |  |        |               |  |  |  |  |
| Hematophagous            |                                                                                                                                                                                                                                                                                                                                                                                                                                             |               |               |               |               |               |               |        |        |          |        |             |        |        |          |  |               |  |   |          |  |               |  |  |  |  |                                                                                                                                                                                                                                                                                                                                                                                                                                       |  |               |             |               |               |               |  |        |        |        |             |  |  |        |        |               |  |  |  |        |               |  |  |  |  |                                                                                                                                                                                                                                                                                                                                                                                                                                       |  |               |             |               |               |               |  |        |        |        |             |  |  |        |        |               |  |  |  |        |               |  |  |  |  |
|                          | Nectarivorous                                                                                                                                                                                                                                                                                                                                                                                                                               | Frugivorous   | Insectivorous | Hematophagous |               |               |               |        |        |          |        |             |        |        |          |  |               |  |   |          |  |               |  |  |  |  |                                                                                                                                                                                                                                                                                                                                                                                                                                       |  |               |             |               |               |               |  |        |        |        |             |  |  |        |        |               |  |  |  |        |               |  |  |  |  |                                                                                                                                                                                                                                                                                                                                                                                                                                       |  |               |             |               |               |               |  |        |        |        |             |  |  |        |        |               |  |  |  |        |               |  |  |  |  |
| Nectarivorous            |                                                                                                                                                                                                                                                                                                                                                                                                                                             | 0.0038        | 0.0024        | 0.0038        |               |               |               |        |        |          |        |             |        |        |          |  |               |  |   |          |  |               |  |  |  |  |                                                                                                                                                                                                                                                                                                                                                                                                                                       |  |               |             |               |               |               |  |        |        |        |             |  |  |        |        |               |  |  |  |        |               |  |  |  |  |                                                                                                                                                                                                                                                                                                                                                                                                                                       |  |               |             |               |               |               |  |        |        |        |             |  |  |        |        |               |  |  |  |        |               |  |  |  |  |
| Frugivorous              |                                                                                                                                                                                                                                                                                                                                                                                                                                             |               | 0.0054        | 0.0116        |               |               |               |        |        |          |        |             |        |        |          |  |               |  |   |          |  |               |  |  |  |  |                                                                                                                                                                                                                                                                                                                                                                                                                                       |  |               |             |               |               |               |  |        |        |        |             |  |  |        |        |               |  |  |  |        |               |  |  |  |  |                                                                                                                                                                                                                                                                                                                                                                                                                                       |  |               |             |               |               |               |  |        |        |        |             |  |  |        |        |               |  |  |  |        |               |  |  |  |  |
| Insectivorous            |                                                                                                                                                                                                                                                                                                                                                                                                                                             |               |               | 0.815         |               |               |               |        |        |          |        |             |        |        |          |  |               |  |   |          |  |               |  |  |  |  |                                                                                                                                                                                                                                                                                                                                                                                                                                       |  |               |             |               |               |               |  |        |        |        |             |  |  |        |        |               |  |  |  |        |               |  |  |  |  |                                                                                                                                                                                                                                                                                                                                                                                                                                       |  |               |             |               |               |               |  |        |        |        |             |  |  |        |        |               |  |  |  |        |               |  |  |  |  |
| Hematophagous            |                                                                                                                                                                                                                                                                                                                                                                                                                                             |               |               |               |               |               |               |        |        |          |        |             |        |        |          |  |               |  |   |          |  |               |  |  |  |  |                                                                                                                                                                                                                                                                                                                                                                                                                                       |  |               |             |               |               |               |  |        |        |        |             |  |  |        |        |               |  |  |  |        |               |  |  |  |  |                                                                                                                                                                                                                                                                                                                                                                                                                                       |  |               |             |               |               |               |  |        |        |        |             |  |  |        |        |               |  |  |  |        |               |  |  |  |  |
|                          | Nectarivorous                                                                                                                                                                                                                                                                                                                                                                                                                               | Frugivorous   | Insectivorous | Hematophagous |               |               |               |        |        |          |        |             |        |        |          |  |               |  |   |          |  |               |  |  |  |  |                                                                                                                                                                                                                                                                                                                                                                                                                                       |  |               |             |               |               |               |  |        |        |        |             |  |  |        |        |               |  |  |  |        |               |  |  |  |  |                                                                                                                                                                                                                                                                                                                                                                                                                                       |  |               |             |               |               |               |  |        |        |        |             |  |  |        |        |               |  |  |  |        |               |  |  |  |  |
| Nectarivorous            |                                                                                                                                                                                                                                                                                                                                                                                                                                             | 0.6718        | 0.0024        | 0.0016        |               |               |               |        |        |          |        |             |        |        |          |  |               |  |   |          |  |               |  |  |  |  |                                                                                                                                                                                                                                                                                                                                                                                                                                       |  |               |             |               |               |               |  |        |        |        |             |  |  |        |        |               |  |  |  |        |               |  |  |  |  |                                                                                                                                                                                                                                                                                                                                                                                                                                       |  |               |             |               |               |               |  |        |        |        |             |  |  |        |        |               |  |  |  |        |               |  |  |  |  |
| Frugivorous              |                                                                                                                                                                                                                                                                                                                                                                                                                                             |               | 0.0024        | 0.0016        |               |               |               |        |        |          |        |             |        |        |          |  |               |  |   |          |  |               |  |  |  |  |                                                                                                                                                                                                                                                                                                                                                                                                                                       |  |               |             |               |               |               |  |        |        |        |             |  |  |        |        |               |  |  |  |        |               |  |  |  |  |                                                                                                                                                                                                                                                                                                                                                                                                                                       |  |               |             |               |               |               |  |        |        |        |             |  |  |        |        |               |  |  |  |        |               |  |  |  |  |
| Insectivorous            |                                                                                                                                                                                                                                                                                                                                                                                                                                             |               |               | 0.0224        |               |               |               |        |        |          |        |             |        |        |          |  |               |  |   |          |  |               |  |  |  |  |                                                                                                                                                                                                                                                                                                                                                                                                                                       |  |               |             |               |               |               |  |        |        |        |             |  |  |        |        |               |  |  |  |        |               |  |  |  |  |                                                                                                                                                                                                                                                                                                                                                                                                                                       |  |               |             |               |               |               |  |        |        |        |             |  |  |        |        |               |  |  |  |        |               |  |  |  |  |
| Hematophagous            |                                                                                                                                                                                                                                                                                                                                                                                                                                             |               |               |               |               |               |               |        |        |          |        |             |        |        |          |  |               |  |   |          |  |               |  |  |  |  |                                                                                                                                                                                                                                                                                                                                                                                                                                       |  |               |             |               |               |               |  |        |        |        |             |  |  |        |        |               |  |  |  |        |               |  |  |  |  |                                                                                                                                                                                                                                                                                                                                                                                                                                       |  |               |             |               |               |               |  |        |        |        |             |  |  |        |        |               |  |  |  |        |               |  |  |  |  |
| Glutathione peroxidase   | <table><tr><th></th><th>Nectarivorous</th><th>Frugivorous</th><th>Insectivorous</th><th>Hematophagous</th></tr><tr><td>Nectarivorous</td><td>0.0038</td><td>1</td><td>0.0056</td><td></td></tr><tr><td>Frugivorous</td><td></td><td>0.0016</td><td></td><td></td></tr><tr><td>Insectivorous</td><td></td><td></td><td>0.0026</td><td></td></tr><tr><td>Hematophagous</td><td></td><td></td><td></td><td></td></tr></table>                  |               | Nectarivorous | Frugivorous   | Insectivorous | Hematophagous | Nectarivorous | 0.0038 | 1      | 0.0056   |        | Frugivorous |        | 0.0016 |          |  | Insectivorous |  |   | 0.0026   |  | Hematophagous |  |  |  |  | <table><tr><th></th><th>Nectarivorous</th><th>Frugivorous</th><th>Insectivorous</th><th>Hematophagous</th></tr><tr><td>Nectarivorous</td><td></td><td>0.0488</td><td>0.0024</td><td>0.0058</td></tr><tr><td>Frugivorous</td><td></td><td></td><td>1</td><td>0.0056</td></tr><tr><td>Insectivorous</td><td></td><td></td><td></td><td>0.0038</td></tr><tr><td>Hematophagous</td><td></td><td></td><td></td><td></td></tr></table>      |  | Nectarivorous | Frugivorous | Insectivorous | Hematophagous | Nectarivorous |  | 0.0488 | 0.0024 | 0.0058 | Frugivorous |  |  | 1      | 0.0056 | Insectivorous |  |  |  | 0.0038 | Hematophagous |  |  |  |  | <table><tr><th></th><th>Nectarivorous</th><th>Frugivorous</th><th>Insectivorous</th><th>Hematophagous</th></tr><tr><td>Nectarivorous</td><td></td><td>0.1424</td><td>0.0038</td><td>0.5532</td></tr><tr><td>Frugivorous</td><td></td><td></td><td>0.016</td><td></td></tr><tr><td>Insectivorous</td><td></td><td></td><td></td><td>0.0024</td></tr><tr><td>Hematophagous</td><td></td><td></td><td></td><td></td></tr></table>        |  | Nectarivorous | Frugivorous | Insectivorous | Hematophagous | Nectarivorous |  | 0.1424 | 0.0038 | 0.5532 | Frugivorous |  |  | 0.016  |        | Insectivorous |  |  |  | 0.0024 | Hematophagous |  |  |  |  |
|                          |                                                                                                                                                                                                                                                                                                                                                                                                                                             | Nectarivorous | Frugivorous   | Insectivorous | Hematophagous |               |               |        |        |          |        |             |        |        |          |  |               |  |   |          |  |               |  |  |  |  |                                                                                                                                                                                                                                                                                                                                                                                                                                       |  |               |             |               |               |               |  |        |        |        |             |  |  |        |        |               |  |  |  |        |               |  |  |  |  |                                                                                                                                                                                                                                                                                                                                                                                                                                       |  |               |             |               |               |               |  |        |        |        |             |  |  |        |        |               |  |  |  |        |               |  |  |  |  |
|                          | Nectarivorous                                                                                                                                                                                                                                                                                                                                                                                                                               | 0.0038        | 1             | 0.0056        |               |               |               |        |        |          |        |             |        |        |          |  |               |  |   |          |  |               |  |  |  |  |                                                                                                                                                                                                                                                                                                                                                                                                                                       |  |               |             |               |               |               |  |        |        |        |             |  |  |        |        |               |  |  |  |        |               |  |  |  |  |                                                                                                                                                                                                                                                                                                                                                                                                                                       |  |               |             |               |               |               |  |        |        |        |             |  |  |        |        |               |  |  |  |        |               |  |  |  |  |
|                          | Frugivorous                                                                                                                                                                                                                                                                                                                                                                                                                                 |               | 0.0016        |               |               |               |               |        |        |          |        |             |        |        |          |  |               |  |   |          |  |               |  |  |  |  |                                                                                                                                                                                                                                                                                                                                                                                                                                       |  |               |             |               |               |               |  |        |        |        |             |  |  |        |        |               |  |  |  |        |               |  |  |  |  |                                                                                                                                                                                                                                                                                                                                                                                                                                       |  |               |             |               |               |               |  |        |        |        |             |  |  |        |        |               |  |  |  |        |               |  |  |  |  |
|                          | Insectivorous                                                                                                                                                                                                                                                                                                                                                                                                                               |               |               | 0.0026        |               |               |               |        |        |          |        |             |        |        |          |  |               |  |   |          |  |               |  |  |  |  |                                                                                                                                                                                                                                                                                                                                                                                                                                       |  |               |             |               |               |               |  |        |        |        |             |  |  |        |        |               |  |  |  |        |               |  |  |  |  |                                                                                                                                                                                                                                                                                                                                                                                                                                       |  |               |             |               |               |               |  |        |        |        |             |  |  |        |        |               |  |  |  |        |               |  |  |  |  |
| Hematophagous            |                                                                                                                                                                                                                                                                                                                                                                                                                                             |               |               |               |               |               |               |        |        |          |        |             |        |        |          |  |               |  |   |          |  |               |  |  |  |  |                                                                                                                                                                                                                                                                                                                                                                                                                                       |  |               |             |               |               |               |  |        |        |        |             |  |  |        |        |               |  |  |  |        |               |  |  |  |  |                                                                                                                                                                                                                                                                                                                                                                                                                                       |  |               |             |               |               |               |  |        |        |        |             |  |  |        |        |               |  |  |  |        |               |  |  |  |  |
|                          | Nectarivorous                                                                                                                                                                                                                                                                                                                                                                                                                               | Frugivorous   | Insectivorous | Hematophagous |               |               |               |        |        |          |        |             |        |        |          |  |               |  |   |          |  |               |  |  |  |  |                                                                                                                                                                                                                                                                                                                                                                                                                                       |  |               |             |               |               |               |  |        |        |        |             |  |  |        |        |               |  |  |  |        |               |  |  |  |  |                                                                                                                                                                                                                                                                                                                                                                                                                                       |  |               |             |               |               |               |  |        |        |        |             |  |  |        |        |               |  |  |  |        |               |  |  |  |  |
| Nectarivorous            |                                                                                                                                                                                                                                                                                                                                                                                                                                             | 0.0488        | 0.0024        | 0.0058        |               |               |               |        |        |          |        |             |        |        |          |  |               |  |   |          |  |               |  |  |  |  |                                                                                                                                                                                                                                                                                                                                                                                                                                       |  |               |             |               |               |               |  |        |        |        |             |  |  |        |        |               |  |  |  |        |               |  |  |  |  |                                                                                                                                                                                                                                                                                                                                                                                                                                       |  |               |             |               |               |               |  |        |        |        |             |  |  |        |        |               |  |  |  |        |               |  |  |  |  |
| Frugivorous              |                                                                                                                                                                                                                                                                                                                                                                                                                                             |               | 1             | 0.0056        |               |               |               |        |        |          |        |             |        |        |          |  |               |  |   |          |  |               |  |  |  |  |                                                                                                                                                                                                                                                                                                                                                                                                                                       |  |               |             |               |               |               |  |        |        |        |             |  |  |        |        |               |  |  |  |        |               |  |  |  |  |                                                                                                                                                                                                                                                                                                                                                                                                                                       |  |               |             |               |               |               |  |        |        |        |             |  |  |        |        |               |  |  |  |        |               |  |  |  |  |
| Insectivorous            |                                                                                                                                                                                                                                                                                                                                                                                                                                             |               |               | 0.0038        |               |               |               |        |        |          |        |             |        |        |          |  |               |  |   |          |  |               |  |  |  |  |                                                                                                                                                                                                                                                                                                                                                                                                                                       |  |               |             |               |               |               |  |        |        |        |             |  |  |        |        |               |  |  |  |        |               |  |  |  |  |                                                                                                                                                                                                                                                                                                                                                                                                                                       |  |               |             |               |               |               |  |        |        |        |             |  |  |        |        |               |  |  |  |        |               |  |  |  |  |
| Hematophagous            |                                                                                                                                                                                                                                                                                                                                                                                                                                             |               |               |               |               |               |               |        |        |          |        |             |        |        |          |  |               |  |   |          |  |               |  |  |  |  |                                                                                                                                                                                                                                                                                                                                                                                                                                       |  |               |             |               |               |               |  |        |        |        |             |  |  |        |        |               |  |  |  |        |               |  |  |  |  |                                                                                                                                                                                                                                                                                                                                                                                                                                       |  |               |             |               |               |               |  |        |        |        |             |  |  |        |        |               |  |  |  |        |               |  |  |  |  |
|                          | Nectarivorous                                                                                                                                                                                                                                                                                                                                                                                                                               | Frugivorous   | Insectivorous | Hematophagous |               |               |               |        |        |          |        |             |        |        |          |  |               |  |   |          |  |               |  |  |  |  |                                                                                                                                                                                                                                                                                                                                                                                                                                       |  |               |             |               |               |               |  |        |        |        |             |  |  |        |        |               |  |  |  |        |               |  |  |  |  |                                                                                                                                                                                                                                                                                                                                                                                                                                       |  |               |             |               |               |               |  |        |        |        |             |  |  |        |        |               |  |  |  |        |               |  |  |  |  |
| Nectarivorous            |                                                                                                                                                                                                                                                                                                                                                                                                                                             | 0.1424        | 0.0038        | 0.5532        |               |               |               |        |        |          |        |             |        |        |          |  |               |  |   |          |  |               |  |  |  |  |                                                                                                                                                                                                                                                                                                                                                                                                                                       |  |               |             |               |               |               |  |        |        |        |             |  |  |        |        |               |  |  |  |        |               |  |  |  |  |                                                                                                                                                                                                                                                                                                                                                                                                                                       |  |               |             |               |               |               |  |        |        |        |             |  |  |        |        |               |  |  |  |        |               |  |  |  |  |
| Frugivorous              |                                                                                                                                                                                                                                                                                                                                                                                                                                             |               | 0.016         |               |               |               |               |        |        |          |        |             |        |        |          |  |               |  |   |          |  |               |  |  |  |  |                                                                                                                                                                                                                                                                                                                                                                                                                                       |  |               |             |               |               |               |  |        |        |        |             |  |  |        |        |               |  |  |  |        |               |  |  |  |  |                                                                                                                                                                                                                                                                                                                                                                                                                                       |  |               |             |               |               |               |  |        |        |        |             |  |  |        |        |               |  |  |  |        |               |  |  |  |  |
| Insectivorous            |                                                                                                                                                                                                                                                                                                                                                                                                                                             |               |               | 0.0024        |               |               |               |        |        |          |        |             |        |        |          |  |               |  |   |          |  |               |  |  |  |  |                                                                                                                                                                                                                                                                                                                                                                                                                                       |  |               |             |               |               |               |  |        |        |        |             |  |  |        |        |               |  |  |  |        |               |  |  |  |  |                                                                                                                                                                                                                                                                                                                                                                                                                                       |  |               |             |               |               |               |  |        |        |        |             |  |  |        |        |               |  |  |  |        |               |  |  |  |  |
| Hematophagous            |                                                                                                                                                                                                                                                                                                                                                                                                                                             |               |               |               |               |               |               |        |        |          |        |             |        |        |          |  |               |  |   |          |  |               |  |  |  |  |                                                                                                                                                                                                                                                                                                                                                                                                                                       |  |               |             |               |               |               |  |        |        |        |             |  |  |        |        |               |  |  |  |        |               |  |  |  |  |                                                                                                                                                                                                                                                                                                                                                                                                                                       |  |               |             |               |               |               |  |        |        |        |             |  |  |        |        |               |  |  |  |        |               |  |  |  |  |
| Citathione-S-transferase | <table><tr><th></th><th>Nectarivorous</th><th>Frugivorous</th><th>Insectivorous</th><th>Hematophagous</th></tr><tr><td>Nectarivorous</td><td>0.0062</td><td>0.0047</td><td>0.002474</td><td></td></tr><tr><td>Frugivorous</td><td></td><td>0.0293</td><td>0.002474</td><td></td></tr><tr><td>Insectivorous</td><td></td><td></td><td>0.002474</td><td></td></tr><tr><td>Hematophagous</td><td></td><td></td><td></td><td></td></tr></table> |               | Nectarivorous | Frugivorous   | Insectivorous | Hematophagous | Nectarivorous | 0.0062 | 0.0047 | 0.002474 |        | Frugivorous |        | 0.0293 | 0.002474 |  | Insectivorous |  |   | 0.002474 |  | Hematophagous |  |  |  |  | <table><tr><th></th><th>Nectarivorous</th><th>Frugivorous</th><th>Insectivorous</th><th>Hematophagous</th></tr><tr><td>Nectarivorous</td><td></td><td>0.0088</td><td>0.0016</td><td>0.0038</td></tr><tr><td>Frugivorous</td><td></td><td></td><td>0.0961</td><td>0.0038</td></tr><tr><td>Insectivorous</td><td></td><td></td><td></td><td>0.0026</td></tr><tr><td>Hematophagous</td><td></td><td></td><td></td><td></td></tr></table> |  | Nectarivorous | Frugivorous | Insectivorous | Hematophagous | Nectarivorous |  | 0.0088 | 0.0016 | 0.0038 | Frugivorous |  |  | 0.0961 | 0.0038 | Insectivorous |  |  |  | 0.0026 | Hematophagous |  |  |  |  | <table><tr><th></th><th>Nectarivorous</th><th>Frugivorous</th><th>Insectivorous</th><th>Hematophagous</th></tr><tr><td>Nectarivorous</td><td></td><td>0.0024</td><td>0.7999</td><td>0.0016</td></tr><tr><td>Frugivorous</td><td></td><td></td><td>0.0371</td><td>0.0016</td></tr><tr><td>Insectivorous</td><td></td><td></td><td></td><td>0.0056</td></tr><tr><td>Hematophagous</td><td></td><td></td><td></td><td></td></tr></table> |  | Nectarivorous | Frugivorous | Insectivorous | Hematophagous | Nectarivorous |  | 0.0024 | 0.7999 | 0.0016 | Frugivorous |  |  | 0.0371 | 0.0016 | Insectivorous |  |  |  | 0.0056 | Hematophagous |  |  |  |  |
|                          |                                                                                                                                                                                                                                                                                                                                                                                                                                             | Nectarivorous | Frugivorous   | Insectivorous | Hematophagous |               |               |        |        |          |        |             |        |        |          |  |               |  |   |          |  |               |  |  |  |  |                                                                                                                                                                                                                                                                                                                                                                                                                                       |  |               |             |               |               |               |  |        |        |        |             |  |  |        |        |               |  |  |  |        |               |  |  |  |  |                                                                                                                                                                                                                                                                                                                                                                                                                                       |  |               |             |               |               |               |  |        |        |        |             |  |  |        |        |               |  |  |  |        |               |  |  |  |  |
|                          | Nectarivorous                                                                                                                                                                                                                                                                                                                                                                                                                               | 0.0062        | 0.0047        | 0.002474      |               |               |               |        |        |          |        |             |        |        |          |  |               |  |   |          |  |               |  |  |  |  |                                                                                                                                                                                                                                                                                                                                                                                                                                       |  |               |             |               |               |               |  |        |        |        |             |  |  |        |        |               |  |  |  |        |               |  |  |  |  |                                                                                                                                                                                                                                                                                                                                                                                                                                       |  |               |             |               |               |               |  |        |        |        |             |  |  |        |        |               |  |  |  |        |               |  |  |  |  |
|                          | Frugivorous                                                                                                                                                                                                                                                                                                                                                                                                                                 |               | 0.0293        | 0.002474      |               |               |               |        |        |          |        |             |        |        |          |  |               |  |   |          |  |               |  |  |  |  |                                                                                                                                                                                                                                                                                                                                                                                                                                       |  |               |             |               |               |               |  |        |        |        |             |  |  |        |        |               |  |  |  |        |               |  |  |  |  |                                                                                                                                                                                                                                                                                                                                                                                                                                       |  |               |             |               |               |               |  |        |        |        |             |  |  |        |        |               |  |  |  |        |               |  |  |  |  |
|                          | Insectivorous                                                                                                                                                                                                                                                                                                                                                                                                                               |               |               | 0.002474      |               |               |               |        |        |          |        |             |        |        |          |  |               |  |   |          |  |               |  |  |  |  |                                                                                                                                                                                                                                                                                                                                                                                                                                       |  |               |             |               |               |               |  |        |        |        |             |  |  |        |        |               |  |  |  |        |               |  |  |  |  |                                                                                                                                                                                                                                                                                                                                                                                                                                       |  |               |             |               |               |               |  |        |        |        |             |  |  |        |        |               |  |  |  |        |               |  |  |  |  |
| Hematophagous            |                                                                                                                                                                                                                                                                                                                                                                                                                                             |               |               |               |               |               |               |        |        |          |        |             |        |        |          |  |               |  |   |          |  |               |  |  |  |  |                                                                                                                                                                                                                                                                                                                                                                                                                                       |  |               |             |               |               |               |  |        |        |        |             |  |  |        |        |               |  |  |  |        |               |  |  |  |  |                                                                                                                                                                                                                                                                                                                                                                                                                                       |  |               |             |               |               |               |  |        |        |        |             |  |  |        |        |               |  |  |  |        |               |  |  |  |  |
|                          | Nectarivorous                                                                                                                                                                                                                                                                                                                                                                                                                               | Frugivorous   | Insectivorous | Hematophagous |               |               |               |        |        |          |        |             |        |        |          |  |               |  |   |          |  |               |  |  |  |  |                                                                                                                                                                                                                                                                                                                                                                                                                                       |  |               |             |               |               |               |  |        |        |        |             |  |  |        |        |               |  |  |  |        |               |  |  |  |  |                                                                                                                                                                                                                                                                                                                                                                                                                                       |  |               |             |               |               |               |  |        |        |        |             |  |  |        |        |               |  |  |  |        |               |  |  |  |  |
| Nectarivorous            |                                                                                                                                                                                                                                                                                                                                                                                                                                             | 0.0088        | 0.0016        | 0.0038        |               |               |               |        |        |          |        |             |        |        |          |  |               |  |   |          |  |               |  |  |  |  |                                                                                                                                                                                                                                                                                                                                                                                                                                       |  |               |             |               |               |               |  |        |        |        |             |  |  |        |        |               |  |  |  |        |               |  |  |  |  |                                                                                                                                                                                                                                                                                                                                                                                                                                       |  |               |             |               |               |               |  |        |        |        |             |  |  |        |        |               |  |  |  |        |               |  |  |  |  |
| Frugivorous              |                                                                                                                                                                                                                                                                                                                                                                                                                                             |               | 0.0961        | 0.0038        |               |               |               |        |        |          |        |             |        |        |          |  |               |  |   |          |  |               |  |  |  |  |                                                                                                                                                                                                                                                                                                                                                                                                                                       |  |               |             |               |               |               |  |        |        |        |             |  |  |        |        |               |  |  |  |        |               |  |  |  |  |                                                                                                                                                                                                                                                                                                                                                                                                                                       |  |               |             |               |               |               |  |        |        |        |             |  |  |        |        |               |  |  |  |        |               |  |  |  |  |
| Insectivorous            |                                                                                                                                                                                                                                                                                                                                                                                                                                             |               |               | 0.0026        |               |               |               |        |        |          |        |             |        |        |          |  |               |  |   |          |  |               |  |  |  |  |                                                                                                                                                                                                                                                                                                                                                                                                                                       |  |               |             |               |               |               |  |        |        |        |             |  |  |        |        |               |  |  |  |        |               |  |  |  |  |                                                                                                                                                                                                                                                                                                                                                                                                                                       |  |               |             |               |               |               |  |        |        |        |             |  |  |        |        |               |  |  |  |        |               |  |  |  |  |
| Hematophagous            |                                                                                                                                                                                                                                                                                                                                                                                                                                             |               |               |               |               |               |               |        |        |          |        |             |        |        |          |  |               |  |   |          |  |               |  |  |  |  |                                                                                                                                                                                                                                                                                                                                                                                                                                       |  |               |             |               |               |               |  |        |        |        |             |  |  |        |        |               |  |  |  |        |               |  |  |  |  |                                                                                                                                                                                                                                                                                                                                                                                                                                       |  |               |             |               |               |               |  |        |        |        |             |  |  |        |        |               |  |  |  |        |               |  |  |  |  |
|                          | Nectarivorous                                                                                                                                                                                                                                                                                                                                                                                                                               | Frugivorous   | Insectivorous | Hematophagous |               |               |               |        |        |          |        |             |        |        |          |  |               |  |   |          |  |               |  |  |  |  |                                                                                                                                                                                                                                                                                                                                                                                                                                       |  |               |             |               |               |               |  |        |        |        |             |  |  |        |        |               |  |  |  |        |               |  |  |  |  |                                                                                                                                                                                                                                                                                                                                                                                                                                       |  |               |             |               |               |               |  |        |        |        |             |  |  |        |        |               |  |  |  |        |               |  |  |  |  |
| Nectarivorous            |                                                                                                                                                                                                                                                                                                                                                                                                                                             | 0.0024        | 0.7999        | 0.0016        |               |               |               |        |        |          |        |             |        |        |          |  |               |  |   |          |  |               |  |  |  |  |                                                                                                                                                                                                                                                                                                                                                                                                                                       |  |               |             |               |               |               |  |        |        |        |             |  |  |        |        |               |  |  |  |        |               |  |  |  |  |                                                                                                                                                                                                                                                                                                                                                                                                                                       |  |               |             |               |               |               |  |        |        |        |             |  |  |        |        |               |  |  |  |        |               |  |  |  |  |
| Frugivorous              |                                                                                                                                                                                                                                                                                                                                                                                                                                             |               | 0.0371        | 0.0016        |               |               |               |        |        |          |        |             |        |        |          |  |               |  |   |          |  |               |  |  |  |  |                                                                                                                                                                                                                                                                                                                                                                                                                                       |  |               |             |               |               |               |  |        |        |        |             |  |  |        |        |               |  |  |  |        |               |  |  |  |  |                                                                                                                                                                                                                                                                                                                                                                                                                                       |  |               |             |               |               |               |  |        |        |        |             |  |  |        |        |               |  |  |  |        |               |  |  |  |  |
| Insectivorous            |                                                                                                                                                                                                                                                                                                                                                                                                                                             |               |               | 0.0056        |               |               |               |        |        |          |        |             |        |        |          |  |               |  |   |          |  |               |  |  |  |  |                                                                                                                                                                                                                                                                                                                                                                                                                                       |  |               |             |               |               |               |  |        |        |        |             |  |  |        |        |               |  |  |  |        |               |  |  |  |  |                                                                                                                                                                                                                                                                                                                                                                                                                                       |  |               |             |               |               |               |  |        |        |        |             |  |  |        |        |               |  |  |  |        |               |  |  |  |  |
| Hematophagous            |                                                                                                                                                                                                                                                                                                                                                                                                                                             |               |               |               |               |               |               |        |        |          |        |             |        |        |          |  |               |  |   |          |  |               |  |  |  |  |                                                                                                                                                                                                                                                                                                                                                                                                                                       |  |               |             |               |               |               |  |        |        |        |             |  |  |        |        |               |  |  |  |        |               |  |  |  |  |                                                                                                                                                                                                                                                                                                                                                                                                                                       |  |               |             |               |               |               |  |        |        |        |             |  |  |        |        |               |  |  |  |        |               |  |  |  |  |

**Table S3.** Pairwise PERMANOVA test among the samples of non-enzymatic antioxidants measured in the heart, liver, and kidney of nectarivorous, frugivorous, insectivorous, and hematophagous bats. Bolded numbers indicate statistically significant p-values ( $p < 0.05$ ).

|                       | Heart         |               |               |               | Liver         |               |               |               | Kidney        |               |               |               |
|-----------------------|---------------|---------------|---------------|---------------|---------------|---------------|---------------|---------------|---------------|---------------|---------------|---------------|
| Total Glutathione     | Nectarivorous | Frugivorous   | Insectivorous | Hematophagous | Nectarivorous | Frugivorous   | Insectivorous | Hematophagous | Nectarivorous | Frugivorous   | Insectivorous | Hematophagous |
|                       |               | 0.0842        | 0.2912        | <b>0.0056</b> |               | 1             | 1             | <b>0.0201</b> |               | <b>0.0038</b> | <b>0.0026</b> | <b>0.0038</b> |
|                       |               |               | 1             | <b>0.0038</b> |               |               | 1             | 0.4982        |               |               | <b>0.0016</b> | <b>0.0214</b> |
|                       |               |               |               | <b>0.0038</b> |               |               |               | <b>0.0346</b> |               |               |               | <b>0.0016</b> |
| Oxidized Glutathione  | Nectarivorous | Frugivorous   | Insectivorous | Hematophagous | Nectarivorous | Frugivorous   | Insectivorous | Hematophagous | Nectarivorous | Frugivorous   | Insectivorous | Hematophagous |
|                       |               | 1             | 0.5532        | <b>0.0146</b> |               | 0.8881        | 1             | <b>0.0129</b> |               | 0.0961        | <b>0.0024</b> | 1             |
|                       |               |               | <b>0.0119</b> | <b>0.0283</b> |               |               | 1             | <b>0.0392</b> |               |               | 0.0606        | 0.0872        |
|                       |               |               |               | <b>0.0024</b> |               |               |               | <b>0.0437</b> |               |               |               | <b>0.0038</b> |
| Reduced Glutathione   | Nectarivorous | Frugivorous   | Insectivorous | Hematophagous | Nectarivorous | Frugivorous   | Insectivorous | Hematophagous | Nectarivorous | Frugivorous   | Insectivorous | Hematophagous |
|                       |               | <b>0.0365</b> | 0.6214        | <b>0.0056</b> |               | 0.0553        | 0.1442        | 0.9862        |               | <b>0.0038</b> | <b>0.0038</b> | <b>0.0038</b> |
|                       |               |               | 1             | <b>0.0038</b> |               |               | 1             | 0.0891        |               |               | <b>0.0034</b> | <b>0.0371</b> |
|                       |               |               |               | <b>0.0056</b> |               |               |               | 0.0891        |               |               |               | <b>0.0024</b> |
| GSSG/GSH              | Nectarivorous | Frugivorous   | Insectivorous | Hematophagous | Nectarivorous | Frugivorous   | Insectivorous | Hematophagous | Nectarivorous | Frugivorous   | Insectivorous | Hematophagous |
|                       |               | 0.6697        | 0.1609        | <b>0.0144</b> |               | 0.3933        | <b>0.0486</b> | <b>0.0486</b> |               | <b>0.0038</b> | <b>0.0056</b> | <b>0.0056</b> |
|                       |               |               | 1             | <b>0.0271</b> |               |               | 1             | 1             |               |               | 1             | 1             |
|                       |               |               |               | 0.2571        |               |               |               | 1             |               |               |               | 0.1437        |
| Nitrites and Nitrates | Nectarivorous | Frugivorous   | Insectivorous | Hematophagous | Nectarivorous | Frugivorous   | Insectivorous | Hematophagous | Nectarivorous | Frugivorous   | Insectivorous | Hematophagous |
|                       |               | 0.0626        | 1             | <b>0.0024</b> |               | <b>0.0033</b> | 0.2961        | <b>0.0064</b> |               | 0.7999        | 1             | <b>0.0271</b> |
|                       |               |               | 0.07658       | <b>0.0065</b> |               |               | <b>0.0034</b> |               |               |               | 0.3821        | <b>0.0146</b> |
|                       |               |               |               | <b>0.0016</b> |               |               |               | <b>0.0031</b> |               |               |               | <b>0.0488</b> |

**Table S4.** Pairwise PERMANOVA test among the samples of heart grouped according to bat species. Bolded numbers indicate statistically significant p-values ( $p < 0.05$ ).

|               | Nectarivorous | Frugivorous   | Insectivorous | Hematophagous |
|---------------|---------------|---------------|---------------|---------------|
| Nectarivorous |               | <b>0.0257</b> | <b>0.021</b>  | <b>0.025</b>  |
| Frugivorous   |               |               | <b>0.013</b>  | 0.889         |
| Insectivorous |               |               |               | <b>0.023</b>  |
| Hematophagous |               |               |               |               |

**Table S5.** Pairwise PERMANOVA test among the samples of liver grouped according to bat species. Bolded numbers indicate statistically significant p-values ( $p < 0.05$ ).

|               | Nectarivorous | Frugivorous | Insectivorous | Hematophagous |
|---------------|---------------|-------------|---------------|---------------|
| Nectarivorous |               | 0.1041      | 0.7568        | 0.1041        |
| Frugivorous   |               |             | 0.0640        | <b>0.0489</b> |
| Insectivorous |               |             |               | <b>0.0451</b> |
| Hematophagous |               |             |               |               |

**Table S6.** Pairwise PERMANOVA test among the samples of kidney grouped according to bat species. Bolded numbers indicate statistically significant p-values ( $p < 0.05$ ).

|               | Nectarivorous | Frugivorous   | Insectivorous | Hematophagous |
|---------------|---------------|---------------|---------------|---------------|
| Nectarivorous |               | <b>0.1041</b> | <b>0.0156</b> | <b>0.0104</b> |
| Frugivorous   |               |               | <b>0.0140</b> | 0.4041        |
| Insectivorous |               |               |               | <b>0.0151</b> |
| Hematophagous |               |               |               |               |

**Table S7.** P-values for the Spearman's correlations between oxidative markers and (enzymatic and non-enzymatic) antioxidants measured in the heart. Bolded numbers indicate statistically significant p-values ( $p < 0.05$ ).

| Carbonyl                         | MDA    | NO <sub>2</sub> &NO <sub>3</sub> | GSSG/GSH | VitC   | H <sub>2</sub> O <sub>2</sub> ↓ | SOD      | Fumarase | GPx      | GST      |
|----------------------------------|--------|----------------------------------|----------|--------|---------------------------------|----------|----------|----------|----------|
| Carbonyl                         | 0.0187 | 5.67E-08                         | 0.0085   | 0.0401 | 0.0220                          | 0.0043   | 0.0688   | 0.0192   | 0.0146   |
| MDA                              |        | 0.0012                           | 3.62E-05 | 0.0001 | 1.18E-07                        | 7.78E-08 | 0.0011   | 0.4202   | 9.18E-11 |
| NO <sub>2</sub> &NO <sub>3</sub> |        |                                  | 0.0040   | 0.0002 | 0.0001                          | 2.18E-05 | 0.0148   | 2.42E-05 | 1.61E-05 |
| GSSG/GSH                         |        |                                  |          | 0.0037 | 0.0057                          | 2.64E-05 | 0.9933   | 0.3711   | 1.24E-06 |
| VitC                             |        |                                  |          |        | 0.0006                          | 1.01E-07 | 0.4411   | 0.0002   | 3.26E-06 |
| H <sub>2</sub> O <sub>2</sub> ↓  |        |                                  |          |        |                                 | 1.55E-05 | 0.0878   | 0.0362   | 2.55E-09 |
| SOD                              |        |                                  |          |        |                                 |          | 0.0229   | 0.0044   | 5.18E-09 |
| Fumarase                         |        |                                  |          |        |                                 |          |          | 0.2907   | 8.86E-02 |
| GPx                              |        |                                  |          |        |                                 |          |          |          | 0.1304   |
| GST                              |        |                                  |          |        |                                 |          |          |          |          |

**Table S8.** P-values for the Spearman's correlations between oxidative markers and (enzymatic and non-enzymatic) antioxidants measured in the liver. Bolded numbers indicate statistically significant p-values (p<0.05).

[illegible]

**Table S9.** P-values for the Spearman's correlations between oxidative markers and (enzymatic and non-enzymatic) antioxidants measured in the kidney. Bolded numbers indicate statistically significant p-values ( $p < 0.05$ ).

|                                  | Carbonyl | MDA           | NO <sub>2</sub> &NO <sub>3</sub> | GSSG/GSH      | VitC          | H <sub>2</sub> O <sub>2</sub> ↓ | SOD           | Fumarase      | GPx           | GST           |
|----------------------------------|----------|---------------|----------------------------------|---------------|---------------|---------------------------------|---------------|---------------|---------------|---------------|
| Carbonyl                         |          | <b>0.0315</b> | 0.0707                           | <b>0.0183</b> | 0.2327        | <b>0.0007</b>                   | 0.3578        | <b>0.0397</b> | <b>0.0251</b> | <b>0.0001</b> |
| MDA                              |          |               | <b>0.0084</b>                    | 0.5599        | 0.2447        | 0.2957                          | 0.4451        | <b>0.0097</b> | 0.6000        | <b>0.0003</b> |
| NO <sub>2</sub> &NO <sub>3</sub> |          |               |                                  | 0.8016        | 0.6027        | 0.3119                          | <b>0.0443</b> | 0.0564        | 0.1844        | <b>0.0005</b> |
| GSSG/GSH                         |          |               |                                  |               | <b>0.0064</b> | <b>0.0230</b>                   | <b>0.0092</b> | <b>0.0144</b> | <b>0.0099</b> | 0.4437        |
| VitC                             |          |               |                                  |               |               | 0.2071                          | 0.4458        | 0.4662        | 0.5592        | 0.9333        |
| H <sub>2</sub> O <sub>2</sub> ↓  |          |               |                                  |               |               |                                 | <b>0.0002</b> | <b>0.0092</b> | <b>0.0710</b> | 0.1071        |
| SOD                              |          |               |                                  |               |               |                                 |               | 0.0781        | <b>0.0211</b> | 0.1766        |
| Fumarase                         |          |               |                                  |               |               |                                 |               |               | <b>0.0074</b> | <b>0.0081</b> |
| GPx                              |          |               |                                  |               |               |                                 |               |               |               | 0.9301        |
| GST                              |          |               |                                  |               |               |                                 |               |               |               |               |

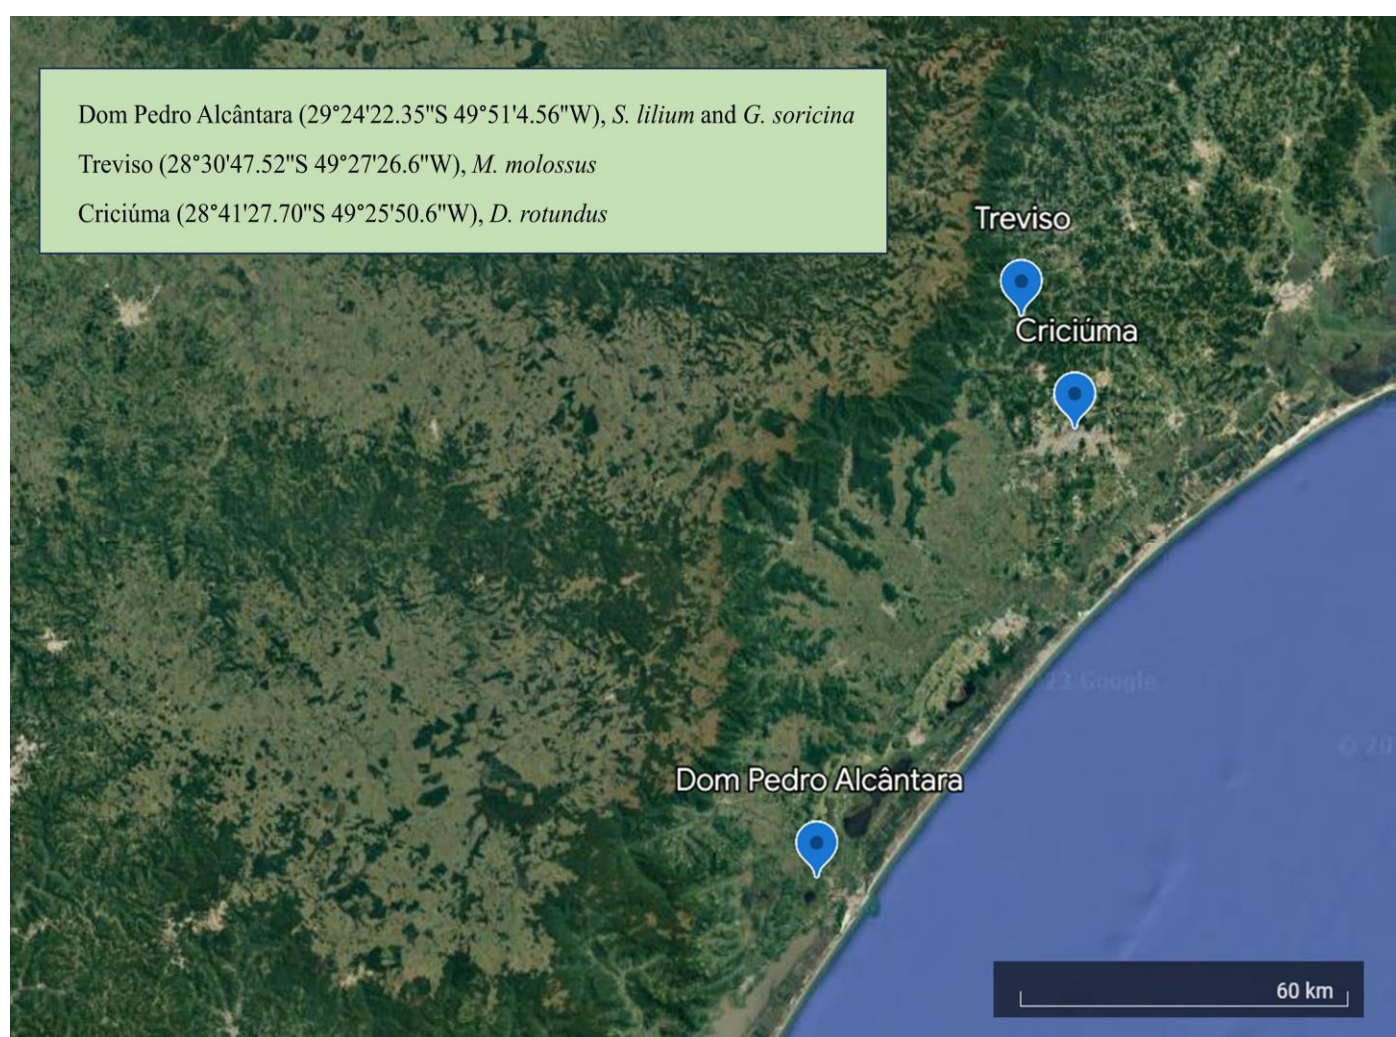**Figure S1** - Map of the collection sites and their coordinates.

---

**Disclaimer/Publisher's Note:** The statements, opinions and data contained in all publications are solely those of the individual author(s) and contributor(s) and not of MDPI and/or the editor(s). MDPI and/or the editor(s) disclaim responsibility for any injury to people or property resulting from any ideas, methods, instructions or products referred to in the content.
